# Supplementary material for: Phytochemical and Ethnopharmacological Perspectives of Ehretia laevis
Source: MDPI journal article supplement (doi:10.3390/molecules26123489), 2021-06-08
Supplement: s1 [file s1]

# Phytochemical and Ethnopharmacological Perspectives of *Ehretia laevis*

Pooja Sharma <sup>1,2</sup>, Richa Shri <sup>1</sup>, Fidele Ntie-Kang <sup>3,4,\*</sup> and Suresh Kumar <sup>1,\*</sup>

<sup>1</sup> Department of Pharmaceutical Sciences and Drug Research, Punjabi University, Patiala-147002, Punjab, India. poojasharmagnu@gmail.com; pooja.sharma2007@yahoo.co.in (P.S.)

<sup>2</sup> Sri Sai College of Pharmacy, Manawala, Amritsar 143001, India.

<sup>3</sup> Department of Chemistry, Faculty of Science, University of Buea, P.O. Box 63 Buea, Cameroon.

<sup>4</sup> Institute for Pharmacy, Martin-Luther-Universität Halle-Wittenberg, Kurt-Mothes-Str. 3, 06120 Halle (Saale), Germany.

\* Correspondence: fidele.ntie-kang@ubuea.cm (F.N.-K.); thakur\_pu@yahoo.com (S.K.)

**Table S1.** Common names of *E. laevis*.

| Region/Language/System of Medicine | Name                                                                                                                                                                               |
|------------------------------------|------------------------------------------------------------------------------------------------------------------------------------------------------------------------------------|
| Andhra Pradesh                     | Paladhantham                                                                                                                                                                       |
| Ayurveda                           | Chamorar, Kapura, Pigakina, Tellapisuni, Pedd pikka, Buri, Tamboliya, Pogadi, Jhadocodkar and Tella                                                                                |
| Gujarati                           | Ivory wood, vadhavaradi                                                                                                                                                            |
| Hindi                              | Chamar, Chamorar, Chamror, Dandos, Darar, Datranga, Khoda, Kolma, Luni, Papri, Tamboli, Tamboliya and Vadhavaradi                                                                  |
| Jammu/Dogri                        | Chamror                                                                                                                                                                            |
| Kanaada                            | Adak, Adaka, Adake, Adike, Bogari, Avak, Bondula, Haalippe, Haatippe, Halippe, Jhadocodkar, Kappura, Kapura, Karadake, Karatuke, Pigakina, Adiki, Ennebudige, Kappure and Karadaka |
| Konkani                            | Kalo gamdo                                                                                                                                                                         |
| Madhyapradesh                      | Datrangi                                                                                                                                                                           |
| Maharashtra                        | Ajaan, Kuptaa, Datrang, Ajaanvrksha, Khandu Chakkaand Lokhandi                                                                                                                     |
| Malayalam                          | Chavandi, Cavanti, Pedda, Sondari, Kalo gamdo, and Charandi                                                                                                                        |
| Marathi                            | Datranga, Tamboli, Kalo-Gomdo and Caranti                                                                                                                                          |
| Nepali                             | Dalingal                                                                                                                                                                           |
| Oriya                              | Mosonea                                                                                                                                                                            |
| Pune                               | Ajan, Vruksha                                                                                                                                                                      |
| Punjabi                            | Chamror, Konkani                                                                                                                                                                   |
| Rajasthan                          | Tamboliya                                                                                                                                                                          |
| Sanskrit                           | Carmivrksa, Carmakaravata, Carmavrksa, Carmiloha and Carmakasa                                                                                                                     |
| Siddha                             | Hallippe, Carmakasa, Karadaka, Papri, Kalvirusus, Pagakina and Narivalli                                                                                                           |
| Tamil                              | Kalivirusu, Kalvirasu, Kuruviccai, Kuruvicci, Pattaiviccu, Tavittan, Narivalli, Pattaiviracu, Kalvirusus and Kuruviracu                                                            |
| Telugu                             | Aadabukkudi, Adabukkudu, Bodidhi, Bokkadi, Buri, Gidiguri, Alabukkudu, Dantam, Chilla Poku, Bukkedi                                                                                |

|             |                                                                                                                                                                                                                                                                                                                                                                                                                     |
|-------------|---------------------------------------------------------------------------------------------------------------------------------------------------------------------------------------------------------------------------------------------------------------------------------------------------------------------------------------------------------------------------------------------------------------------|
|             | Paladantam, Giduguri, Paladantamu, Paldatam, Paaladanthamu, Pedda pikka, Pulimaera, Peddaburimaeli, Pedda Peddapulimera, Peddapiccika, Pogadi, Pogada, Pogadichettu, Poka, Pokachettu, Polimiri, Potubokkada, Reddapulmera, Seregada, Shiragadam, Siragadam, Tella Pisini, Telladzuvvi, Tellajuvvi, Potubokkada, Potubukkeddi, Seregad, Shiragadamu, Siragadamu, Tellajoovi, Tellapisuni, Thellajihvi, Thellapisuni |
| Uttarakhand | Chamrod                                                                                                                                                                                                                                                                                                                                                                                                             |
| West Bengal | Vadhvarni                                                                                                                                                                                                                                                                                                                                                                                                           |

## References

2. Joshi, S.G. *Medicinal Plants*; Oxford and IBH Publishing Co. Private Ltd.: New Delhi, India, 2000, p. 102.
16. Patil, S.L.; Patil, D.A. Ethnomedicinal plants of Dhule district of Maharashtra. *Nat. Prod. Radianc* **2007**, *6*, 148–151.
21. Sharma, J.; Gairola, S.; Sharma, Y.P.; Gaur, R.D. Ethnomedicinal plants used to treat skin diseases by Tharu community of district Udham Singh Nagar, Uttarakhand, India. *J. Ethnopharmacol.* **2014**, *158*, 140–206.
23. Torane, R.C.; Kamble, G.S.; Gadkari, T.V.; Tambe, A.S.; Deshpande, N.R. GC-MS study of nutritious leaves of *Ehretia laevis*. *Int. J. Chemtech. Res.* **2011**, *3*, 1589–1591.
28. Soni, V.; Prakash, A.; Nema, M. Study on ethno medicinal botany of some plants of Dindori district of Madhya Pradesh, India. *Int. J. Pharm. Pharm. Sci.* **2012**, *8*, 1926–1929.
229. Deshpande, R.; Patil, V.; Shah, H.; Ruikar, A.; Gaikwad, S.; Kamble, G.; Mundhe, K.; Adsul, V. Back to mother nature: Novel herbal medicines in preventing dental caries. *J. Dent.* **2018**, *113*, 295–311.
236. Gaikwad, K.N.; Mali, M.V. Tree flora of Nashik city, Maharashtra. *Int. J. Life Sci. Pharm. Res.* **2012**, *2*, 94–101.
237. Rohini, I.; Jirouthu, B.; Kumar, N.S.; Bhavya, C.; Kumar, K.S. An ethno-medicinal survey of medicinal plants used by traditional healers of Araku valley, Andhra Pradesh, India. *Int. J. Curr. Res.* **2017**, *9*, 48633–48645.
